# Supplementary material
Source: PubMed Central journal article supplement (PMC8621678)
Supplement: NIHMS1755467-supplement-1.pdf [file NIHMS1755467-supplement-1.pdf]

**Supplemental Table 1.** METER Adherence Spearman Correlations with Age, Education, Symptoms, Social Cognition and Non-Social Cognition (N = 86)

|                           | METER Adherence                     |
|---------------------------|-------------------------------------|
| Age                       | -0.080 ( $p = .461$ )               |
| Education in Years        | -0.010 ( $p = .925$ )               |
| WRAT-4                    | -0.031 ( $p = .778$ )               |
| ER40 Total                | -0.021 ( $p = .845$ )               |
| BLERT Total               | -0.006 ( $p = .955$ )               |
| Symbol digit              | 0.103 ( $p = .346$ )                |
| HVLT Total                | 0.121 ( $p = .266$ )                |
| LNS                       | 0.088 ( $p = .422$ )                |
| Animal Fluency            | 0.110 ( $p = .312$ )                |
| Trail Making Test A       | -0.134 ( $p = .217$ )               |
| Global Impairment T-Score | 0.128 ( $p = .241$ )                |
| PANSS Positive Score      | -0.113 ( $p = .302$ )               |
| PANSS Negative Score      | 0.123 ( $p = .260$ )                |
| PANSS Total Score         | -0.020 ( $p = .858$ )               |
| MADRS Total               | -0.063 ( $p = .568$ ) <sup>†</sup>  |
| YMRS Total                | -0.130 ( $p = .246$ ) <sup>††</sup> |

N = 85<sup>†</sup>; N = 82<sup>††</sup>
